# Supplementary material for: Sustaining moss picking in W ales: value chain and governance
Source: Research Square preprint supplement (doi:10.21203/rs.3.rs-6889855/v1), 2025-07-08
Supplement: Supplementary file 1 [file 6c9b98efef320199e3263ac0.docx]

**Sustaining moss picking in Wales: value chain and governance**

Elena Górriz-Mifsud*, Carmen Rodríguez Fernández-Blanco, Jenny Wong, Irina Prokofieva

* Correspondence: [elena.gorriz@ctfc.cat](mailto:elena.gorriz@ctfc.cat)

## Supplementary material

#### Supplementary Material 1 - Forest ownership in Wales according to forest size.

Table A1. Forest ownership according to size. Source: Forestry Commission, 2011

2 ha and over Between 0.5 and 2 ha Total area (ha)

NRW Other NRW Other

114,738 167,339 90 21,405 303,572

#### Supplementary Material 2 - Imports and price evolution of imported moss and lichens to United Kingdom.

EUROSTAT (Figure 5) data showed a great variability in source of imports and its corresponding prices. There was a sensible peak in 2006-2007 in terms of amounts and prices, which have decreased later.

Figure 5. Imports (tones) and price (USD/kg) evolution of imported moss and lichens to United Kingdom from different countries in the period 1992-2011. NLD: The Netherlands, DNK: Denmark, NZL: New Zealand, ESP: Spain, IRL: Ireland. Source: own elaboration based on EU-ROSTAT edited by Da Re, R., Vidale E, and Lovric, M. (StarTree deliverable).
